# Supplementary material for: Bioavailability and Solubility of Heavy Metals and Trace Elements during Composting of Cow Manure and Tree Litter
Source: Hindawi journal article supplement (doi:10.1155/2020/5680169), 2020-12-30
Supplement: f1 [file 5680169.f1.docx]

**Supporting Information**


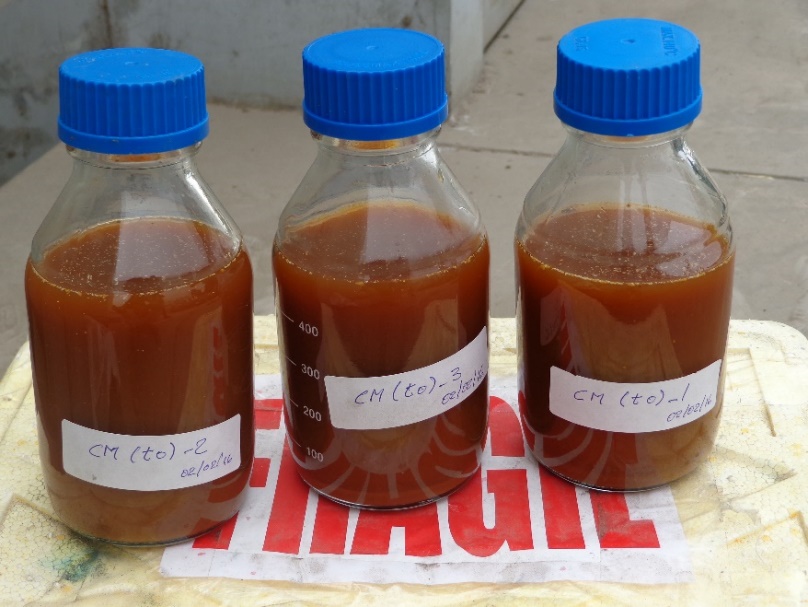


Figura a. Triplicate samples of the activated stock solution (ASS) of beneficial microorganisms at day 0


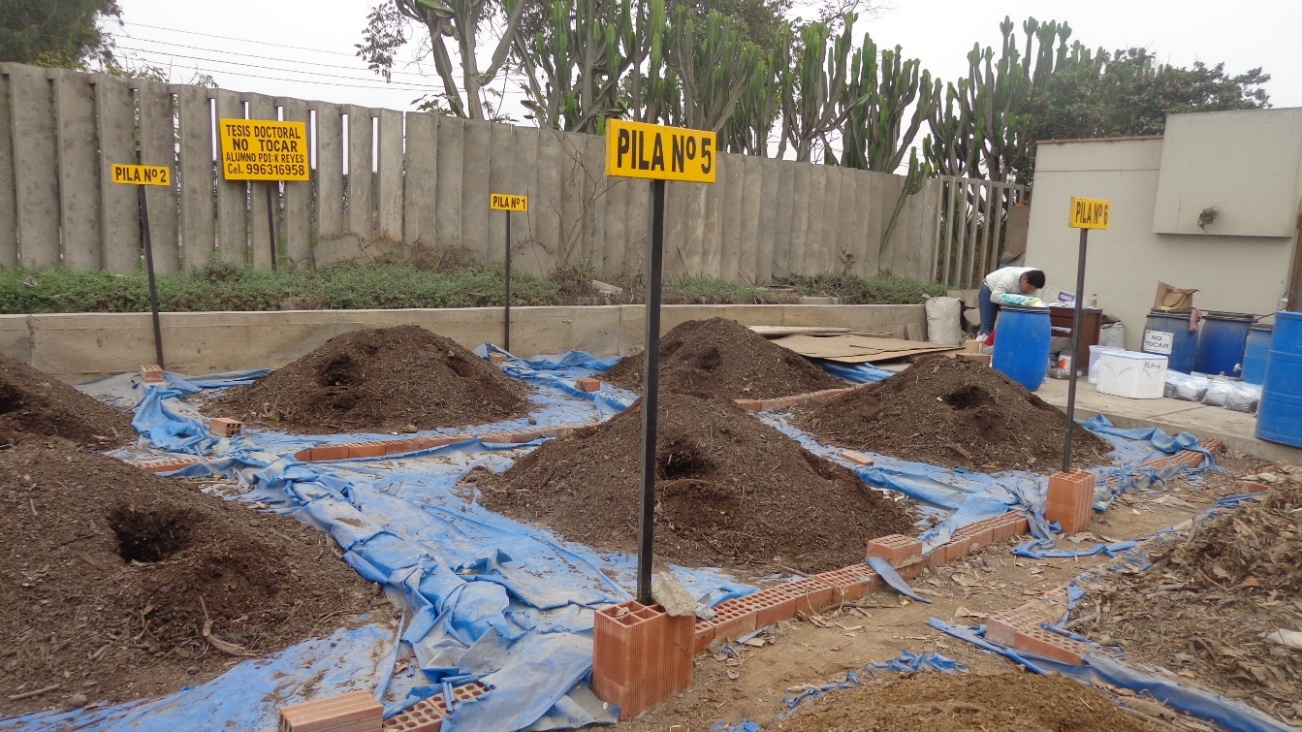


Figure b. Collection of samples from the compost piles on day 120 (T120) of the Evaluation Stage

Table a. Treatments investigated at the Evaluation Stage

| **No.** | **Treatment** | **Coding** | **Repetitions** |
| --- | --- | --- | --- |
| Factor: Inoculated With Beneficial Microorganisms (IBM) | | | |
| 1 | 0 day | T0IBM | P1, P2, P3 |
| 2 | 30 days | T30IBM | P1, P2, P3 |
| 3 | 60 days | T60IBM | P1, P2, P3 |
| 4 | 90 days | T90IBM | P1, P2, P3 |
| 5 | 120 days | T120IBM | P1, P2, P3 |
| Factor: Not Inoculated With Beneficial Microorganisms (NBM) | | | |
| 1 | 0 day | T0NBM | P4, P5, P6 |
| 2 | 30 days | T30NBM | P4, P5, P6 |
| 3 | 60 days | T60NBM | P4, P5, P6 |
| 4 | 90 days | T90NBM | P4, P5, P6 |
| 5 | 120 days | T120NBM | P4, P5, P6 |
